# Supplementary material
Source: publisher site journal article supplement (https://static.cambridge.org/content/id/urn:cambridge.org:id:article:S1935789321002172/resource/name/S1935789321002172supp001.docx)
Supplement: Supplementary file 1 [file S1935789321002172supp001.docx]

**Supplementary** **file:** Role of pharmacists in disaster management

Role of pharmacists in disaster management

1. Clinical roles

Direct patient care in different settings

- Hospitals
- Clinics
- Disaster site
- Home based care

1. Managerial roles

- Medical logistics
- Healthcare delivery
- Preventive measures for foreseeable disasters
